# Supplementary material for: Relationship between the Microbiome and Indoor Temperature/Humidity in a Traditional Japanese House with a Thatched Roof in Kyoto, Japan
Source: MDPI journal article supplement (doi:10.3390/d13100475), 2021-09-28
Supplement: s1 [file s1]

# Relationship Between the Microbiome and Indoor Temperature/Humidity in a Traditional Japanese House with a Thatched Roof in Kyoto, Japan

Makoto Kokubo<sup>1,§</sup>, So Fujiyoshi<sup>2,6,§</sup>, Daisuke Ogura<sup>1,6\*</sup>, Makiko Nakajima<sup>3,6</sup>, Aayako Fujieda<sup>4,6</sup>, Jun Noda<sup>5,6</sup>, and Fumito Maruyama<sup>2,6\*</sup>

<sup>1</sup> Department of Architecture and Architectural Engineering, Graduate School of Engineering, Kyoto University, Kyotodaigaku-Katsura, Nishikyo-ku, Kyoto, 615-8540, Japan.

<sup>2</sup> Office of Industry-Academia-Government and Community Collaboration, Hiroshima University, 1-3-2 Kagamiyama, Higashi-Hiroshima City, Hiroshima, 739-8511, Japan.

<sup>3</sup> Department of Architectural Engineering, Faculty of Engineering, Hiroshima Institute of Technology, 2-1-1 Miyake, Saeki-ku, Hiroshima, 731-5193, Japan.

<sup>4</sup> Faculty of Global Culture, Kyoto Seika University, 137 Iwakura Kincho, Sakyo-ku, Kyoto, 606-8588, Japan

<sup>5</sup> Laboratory of Environmental Health Sciences, Division of Health and Environmental Sciences, School of Veterinary Medicine, Rakuno Gakuen University, Ebetsu, Hokkaido 069-8501, Japan.

<sup>6</sup> Center for HOlobiome and Built Environment (CHOBE), Hiroshima University

<sup>§</sup> Co-first authors: kokubo.makoto.43w@st.kyoto-u.ac.jp (M.K.), fujiyoshi.so.62w@kyoto-u.jp (S.F.)

<sup>\*</sup> Co-correspondence: fumito@hiroshima-u.ac.jp; Tel.: +81-82-424-7048 (F.M), ogurad@archi.kyoto-u.ac.jp; Tel.: +81-75-383-2918 (D.O.)

**Supplemental Table S1.** Monthly average (a) temperature (°C) and (b) relative humidity (%) of the subject house from April, 2018 to September, 2020. Since the difference of physical environment was evaluated by the monthly mean value, we conducted a paired t-test for the monthly average data for each location (April 2018 - March 2019 data and April 2019 - March 2020 data were tested). There were no significant differences between the conditions.

(a)

|        |           | outdoor air            | earth floor space      | space under the ceiling | Storage                 | dining room             | Japanese-style room    |
|--------|-----------|------------------------|------------------------|-------------------------|-------------------------|-------------------------|------------------------|
| 2018   | April     | 15.0                   | 15.1                   | 16.5                    | 17.8                    | 20.6                    | 20.0                   |
|        | May       | 17.4                   | 17.7                   | 19.1                    | 20.1                    | 21.7                    | 21.2                   |
|        | June      | 21.1                   | 21.4                   | 22.4                    | 23.0                    | 23.8                    | 23.6                   |
|        | July      | 27.3                   | 27.3                   | 28.3                    | 28.7                    | 28.5                    | 28.5                   |
|        | August    | 26.8                   | 27.1                   | 27.9                    | 28.3                    | 27.8                    | 27.8                   |
|        | September | 21.6                   | 22.1                   | 22.8                    | 23.4                    | 23.9                    | 24.2                   |
|        | October   | 15.9                   | 16.6                   | 17.2                    | 18.3                    | 19.1                    | 19.0                   |
|        | November  | 11.1                   | 12.1                   | 13.4                    | 15.0                    | 17.4                    | 17.6                   |
|        | December  | 6.1                    | 8.2                    | 11.4                    | 14.1                    | 19.9                    | 23.3                   |
| 2019   | January   | 2.8                    | 4.9                    | 8.9                     | 11.6                    | 17.3                    | 21.4                   |
|        | February  | 4.4                    | 6.2                    | 9.5                     | 12.4                    | 18.3                    | 21.5                   |
|        | March     | 7.1                    | 8.6                    | 11.4                    | 14.2                    | 19.4                    | 20.7                   |
|        | April     | 11.2                   | 12.2                   | 14.3                    | 16.4                    | 20.1                    | 20.3                   |
|        | May       | 17.1                   | 18.0                   | 19.5                    | 20.4                    | 21.1                    | 20.9                   |
|        | June      | 20.6                   | 21.3                   | 22.6                    | 23.3                    | 23.4                    | 23.0                   |
|        | July      | 24.0                   | 24.4                   | 25.5                    | 26.0                    | 25.9                    | 25.7                   |
|        | August    | 26.6                   | 27.3                   | 28.5                    | 28.8                    | 28.1                    | 28.0                   |
|        | September | 23.0                   | 23.9                   | 24.8                    | 25.2                    | 24.9                    | 24.6                   |
|        | October   | 17.1                   | 18.4                   | 19.2                    | 19.9                    | 20.8                    | 20.4                   |
|        | November  | 9.6                    | 11.6                   | 13.1                    | 15.2                    | 18.5                    | 17.4                   |
|        | December  | 5.6                    | 7.7                    | 9.7                     | 13.1                    | 17.9                    | 16.7                   |
| 2020   | January   | 5.1                    | 6.6                    | 8.2                     | 11.1                    | 15.3                    | 14.1                   |
|        | February  | 4.0                    | 6.1                    | 10.0                    | 14.0                    | 21.2                    | 21.2                   |
|        | March     | 7.7                    | 9.5                    | 12.5                    | 16.2                    | 21.7                    | 21.2                   |
|        | April     | 9.6                    | 12.7                   | 15.1                    | 18.0                    | 22.6                    | 20.6                   |
|        | May       | 17.2                   | 18.5                   | 19.9                    | 21.1                    | 22.2                    | —                      |
|        | June      | 21.7                   | 22.5                   | 23.8                    | 23.7                    | 24.5                    | —                      |
|        | July      | 23.4                   | 24.4                   | 25.2                    | —                       | 25.5                    | —                      |
|        | August    | 27.0                   | 27.7                   | 28.9                    | —                       | 28.7                    | —                      |
|        | September | 27.0                   | 27.8                   | 28.7                    | —                       | 28.6                    | —                      |
| t-test |           | t(11)=0.805<br>p=0.438 | t(11)=0.055<br>p=0.957 | t(11)=0.169<br>p=0.869  | t(11)=-0.542<br>p=0.598 | t(11)=-0.196<br>p=0.848 | t(11)=1.559<br>p=0.147 |

(b)

|        |           | outdoor air             | earth floor space       | space under the ceiling | Storage                 | dining room             | Japanese-style room    |
|--------|-----------|-------------------------|-------------------------|-------------------------|-------------------------|-------------------------|------------------------|
| 2018   | April     | 66.4                    | 66.2                    | 59.6                    | 63.2                    | 52.8                    | 53.8                   |
|        | May       | 73.9                    | 71.8                    | 64.4                    | 66.0                    | 60.0                    | 61.6                   |
|        | June      | 81.5                    | 79.5                    | 73.0                    | 73.7                    | 69.6                    | 70.6                   |
|        | July      | 77.7                    | 77.3                    | 71.2                    | 70.9                    | 71.2                    | 71.4                   |
|        | August    | 77.6                    | 76.0                    | 71.1                    | 69.8                    | 71.7                    | 72.2                   |
|        | September | 89.5                    | 85.8                    | 80.8                    | 78.8                    | 76.3                    | 74.6                   |
|        | October   | 85.8                    | 82.0                    | 76.2                    | 76.8                    | 73.8                    | 74.3                   |
|        | November  | 88.9                    | 82.9                    | 76.6                    | 79.6                    | 68.2                    | 67.6                   |
|        | December  | 91.1                    | 80.5                    | 67.2                    | 68.3                    | 47.7                    | 39.8                   |
| 2019   | January   | 91.6                    | 80.8                    | 63.8                    | 61.2                    | 42.6                    | 34.2                   |
|        | February  | 87.4                    | 77.5                    | 63.2                    | 60.4                    | 41.9                    | 35.7                   |
|        | March     | 81.8                    | 73.8                    | 62.7                    | 62.0                    | 45.1                    | 42.7                   |
|        | April     | 74.7                    | 68.9                    | 60.3                    | 61.1                    | 48.8                    | 49.1                   |
|        | May       | 67.8                    | 64.1                    | 57.4                    | 60.3                    | 54.2                    | 57.4                   |
|        | June      | 81.1                    | 78.0                    | 70.6                    | 69.0                    | 70.0                    | 70.4                   |
|        | July      | 89.4                    | 86.5                    | 79.6                    | 79.0                    | 79.0                    | 80.5                   |
|        | August    | 82.9                    | 79.9                    | 72.9                    | 72.1                    | 74.9                    | 76.1                   |
|        | September | 85.4                    | 81.0                    | 74.7                    | 74.4                    | 76.0                    | 77.5                   |
|        | October   | 90.6                    | 84.3                    | 79.2                    | 80.3                    | 76.6                    | 78.6                   |
|        | November  | 87.3                    | 78.9                    | 72.5                    | 73.5                    | 60.8                    | 65.3                   |
|        | December  | 92.6                    | 82.6                    | 74.0                    | 71.4                    | 54.7                    | 58.7                   |
| 2020   | January   | 89.0                    | 82.1                    | 73.6                    | 70.2                    | 54.4                    | 58.2                   |
|        | February  | 88.3                    | 78.7                    | 63.4                    | 62.5                    | 41.6                    | 42.5                   |
|        | March     | 79.9                    | 72.1                    | 60.5                    | 59.4                    | 43.5                    | 45.3                   |
|        | April     | 77.0                    | 65.6                    | 57.5                    | 57.7                    | 44.8                    | 46.7                   |
|        | May       | 78.1                    | 72.0                    | 63.7                    | 66.6                    | 61.5                    | —                      |
|        | June      | 83.4                    | 78.5                    | 68.0                    | 68.0                    | 70.5                    | —                      |
|        | July      | 92.3                    | 85.9                    | 75.3                    | —                       | 80.7                    | —                      |
|        | August    | 83.0                    | 79.6                    | 71.0                    | —                       | 73.6                    | —                      |
|        | September | 82.0                    | 78.1                    | 70.9                    | —                       | 73.0                    | —                      |
| t-test |           | t(11)=−0.864<br>p=0.406 | t(11)=−0.192<br>p=0.851 | t(11)=−0.467<br>p=0.649 | t(11)=−0.138<br>p=0.893 | t(11)=−0.687<br>p=0.506 | t(11)=−2.01<br>p=0.069 |

**Supplemental Table S2.** Number of 18S rRNA sequence reads.

| Sample      | Sampling location                | input     | trimmomatic filter | dada2 filtered | nonchim | no.singleton | Goods coverage [%] |
|-------------|----------------------------------|-----------|--------------------|----------------|---------|--------------|--------------------|
| MK-Cd-18S   | dining room air                  | 1,405,058 | 1,283,374          | 45,000         | 44,682  | 3            | 99.7               |
| MK-Co-18S   | outdoor air                      | 82,894    | 73,612             | 2,618          | 2,569   | 0            | 100.0              |
| MK-Cw-18S   | Japanese-style room air          | 313,690   | 286,834            | 9,749          | 9,570   | 3            | 99.7               |
| MK-S2-18S   | storage wall surface             | 1,401,041 | 1,262,000          | 45,378         | 42,311  | 3            | 99.7               |
| MK-Sc-18S   | storage column surface           | 205,094   | 186,222            | 8,638          | 8,531   | 2            | 99.8               |
| MK-Sd-18S   | dining room wall surface         | 775,433   | 702,265            | 46,221         | 45,758  | 6            | 99.5               |
| MK-Sow1-18S | South side exterior wall surface | 150,602   | 137,553            | 9,871          | 9,207   | 1            | 99.9               |
| MK-Sow2-18S | West side exterior wall surface  | 979,409   | 889,318            | 53,588         | 52,109  | 2            | 99.8               |
| MK-Sr-18S   | earth floor roof surface         | 205,206   | 183,615            | 11,500         | 11,392  | 1            | 99.9               |
| MK-T_A-18S  | thatch west under the eaves      | 162,190   | 146,094            | 13,813         | 13,756  | 1            | 99.9               |
| MK-T_B-18S  | thatch west surface              | 940,854   | 857,489            | 36,584         | 36,119  | 1            | 99.9               |
| MK-T_C-18S  | thatch west inner                | 57,465    | 50,964             | 9,799          | 9,644   | 2            | 99.8               |
| MK-T_D-18S  | thatch south under the eaves     | 27,537    | 25,003             | 1,448          | 1,423   | 0            | 100.0              |
| MK-T_F-18S  | thatch south inner               | 19,534    | 16,982             | 1,467          | 1,410   | 0            | 100.0              |
| MK-Ww1-18S  | well water 1                     | 126,596   | 114,904            | 13,021         | 12,468  | 1            | 99.9               |
| MK-Ww2-18S  | well water 2                     | 19,519    | 17,528             | 3,905          | 3,691   | 1            | 99.9               |

**Supplemental Table S3.** Number of 16S rRNA sequence reads.

| Sample      | Sampling location                | input   | Trimmomatic filter | dada2 filtered | nonchim | Mito,Chloro elimi | no. singleton | Goods coverage [%] |
|-------------|----------------------------------|---------|--------------------|----------------|---------|-------------------|---------------|--------------------|
| MK-Co-16S   | outdoor air                      | 369,852 | 254,066            | 84,725         | 57,731  | 2,608             | 0             | 100                |
| MK-Sb-16S   | bathroom wall surface            | 65,826  | 62,558             | 8,321          | 7,706   | 2,971             | 0             | 100                |
| MK-Sd-16S   | dining room wall surface         | 254,306 | 29,339             | 9,284          | 7,370   | 1,033             | 0             | 100                |
| MK-Sf-16S   | earth floor surface              | 255,595 | 240,160            | 28,143         | 24,799  | 23,607            | 0             | 100                |
| MK-Sow1-16S | South side exterior wall surface | 564,192 | 388,774            | 60,653         | 48,917  | 48,149            | 0             | 100                |
| MK-Sr-16S   | earth floor roof surface         | 93,804  | 22,320             | 3,911          | 3,286   | 1,450             | 0             | 100                |
| MK-T_A-16S  | thatch west under the eaves      | 101,813 | 42,857             | 8,396          | 7,735   | 1,423             | 0             | 100                |
| MK-T_B-16S  | thatch west surface              | 225,529 | 191,733            | 28,865         | 23,465  | 10,440            | 0             | 100                |
| MK-T_C-16S  | thatch west inner                | 385,142 | 36,547             | 9,226          | 6,609   | 1,162             | 0             | 100                |

|                |                                    |         |         |        |        |        |   |     |
|----------------|------------------------------------|---------|---------|--------|--------|--------|---|-----|
| MK-T_D-16S     | thatch south<br>under the<br>eaves | 155,249 | 102,678 | 8,543  | 8,008  | 4,250  | 0 | 100 |
| MK-T_E-16S     | thatch south<br>surface            | 246,410 | 208,447 | 23,073 | 17,552 | 12,324 | 0 | 100 |
| MK-T_F-16S     | thatch south<br>inner              | 274,340 | 105,522 | 6,199  | 5,353  | 4,559  | 0 | 100 |
| MK-Ww1-<br>16S | well water 1                       | 158,498 | 118,727 | 8,630  | 7,233  | 7,195  | 0 | 100 |

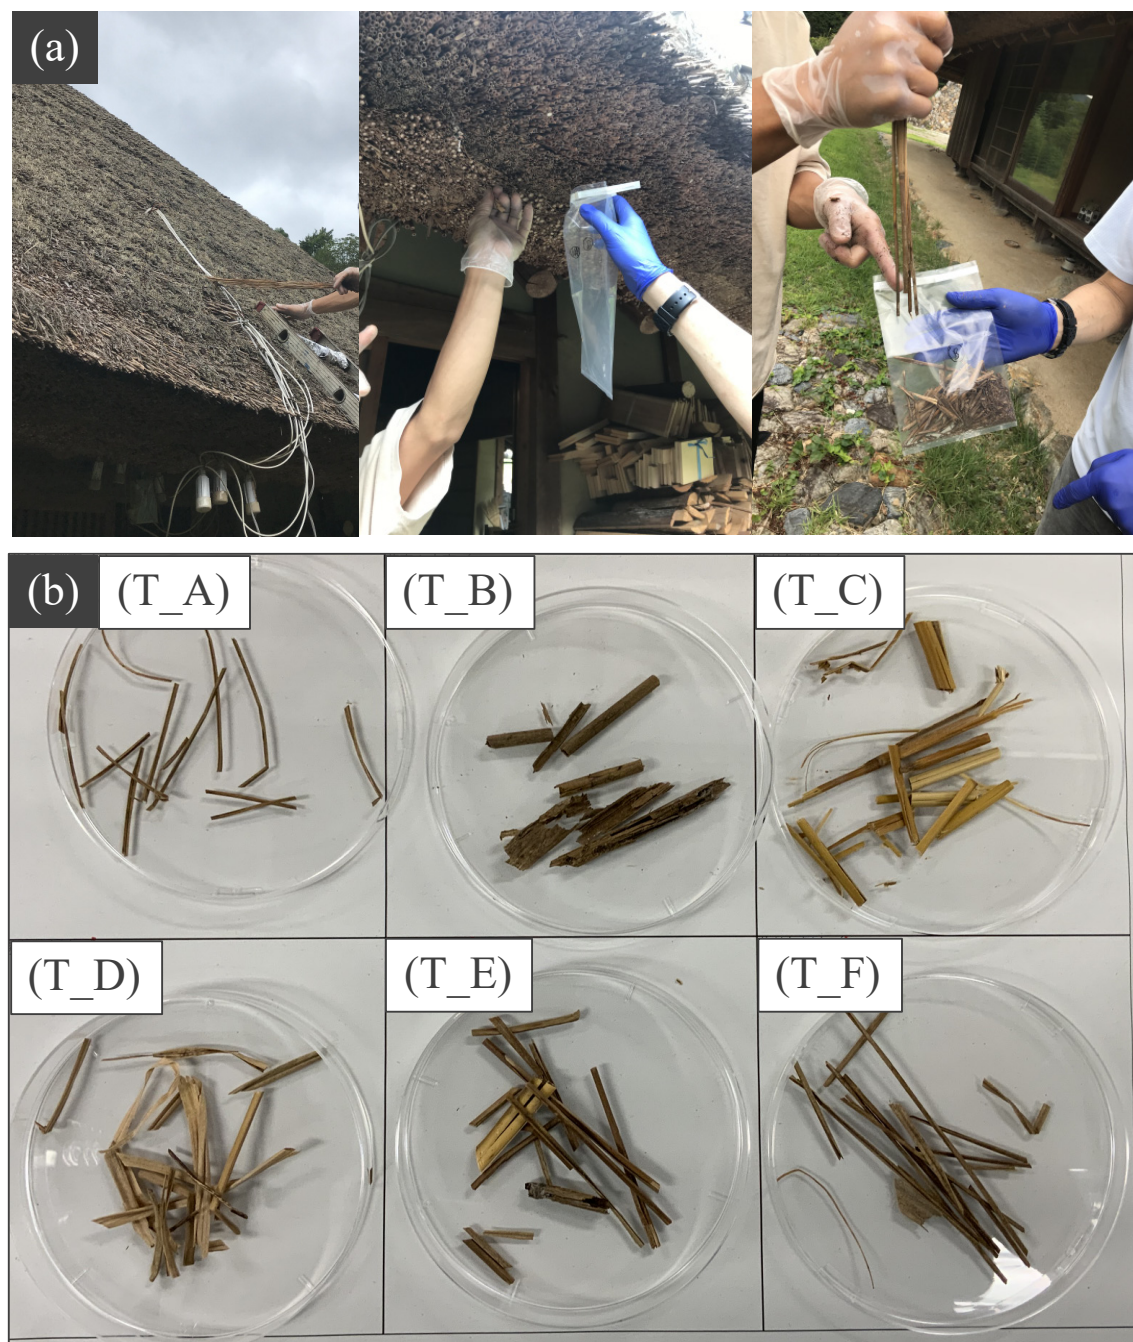

**Supplemental Figure S1.** Pulling out the thatch (a) and thatch (b). The colour and strength of the thatch are different depending on from where it was pulled out.
