# Supplementary figures and images for: Relationship between the Microbiome and Indoor Temperature/Humidity in a Traditional Japanese House with a Thatched Roof in Kyoto, Japan
Source: MDPI journal article supplement (doi:10.3390/d13100475), 2021-09-28

(a)

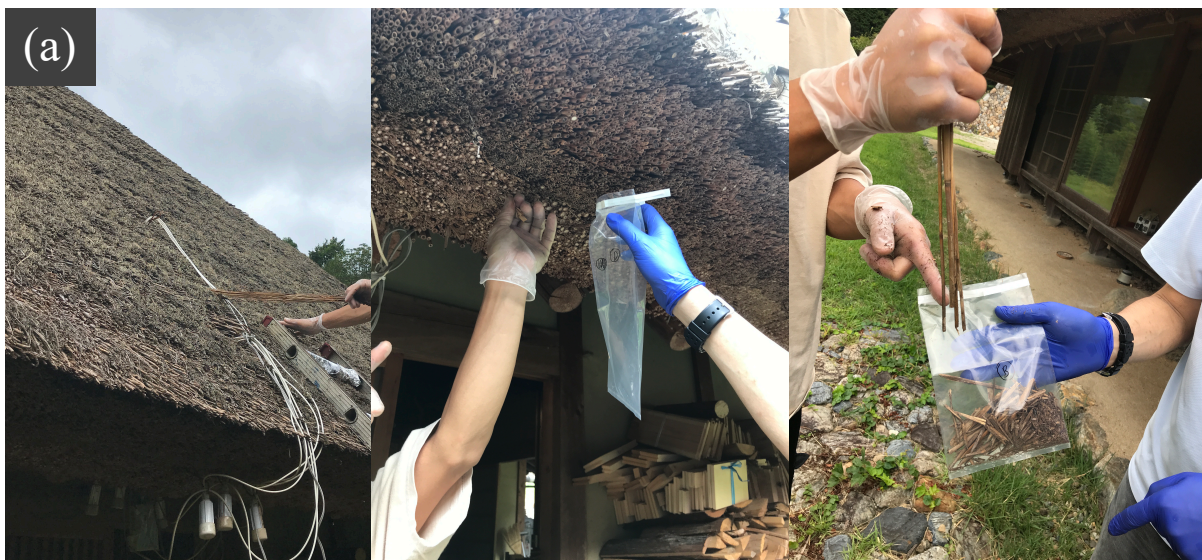

(b) (T\_A)

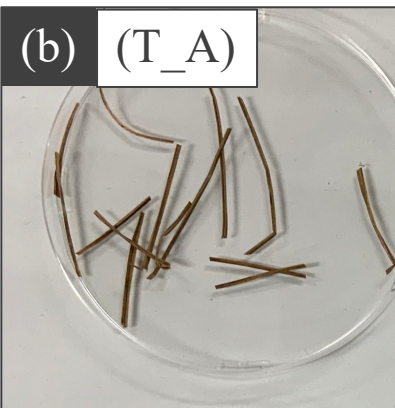

(T\_B)

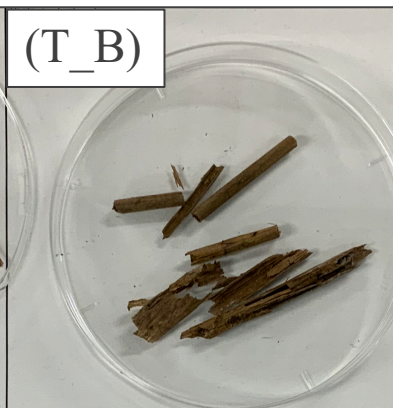

(T\_C)

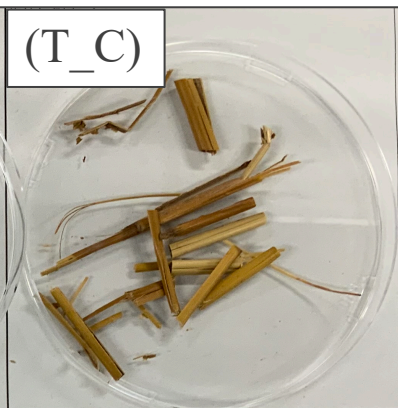

(T\_D)

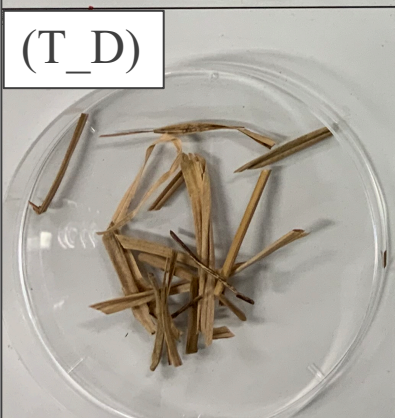

(T\_E)

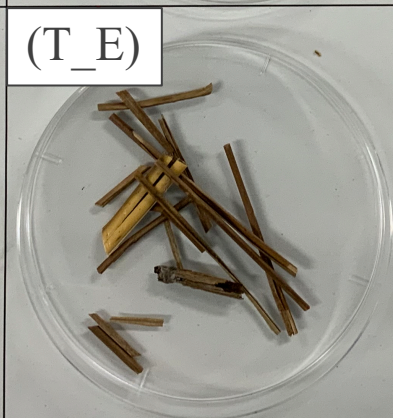

(T\_F)

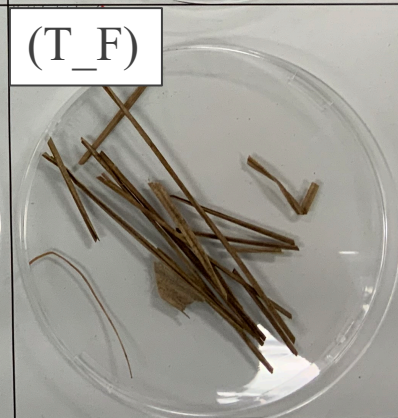

Supplement: s1 [file s1]
